# Supplementary material for: A monocarboxylate transporter rescues frontotemporal dementia and Alzheimer’s disease models
Source: PubMed Central journal article supplement (PMC10513295; doi:10.1371/journal.pgen.1010893), 2023-09-21

**A**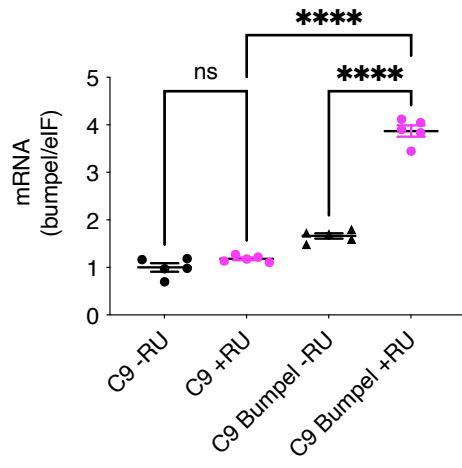**B**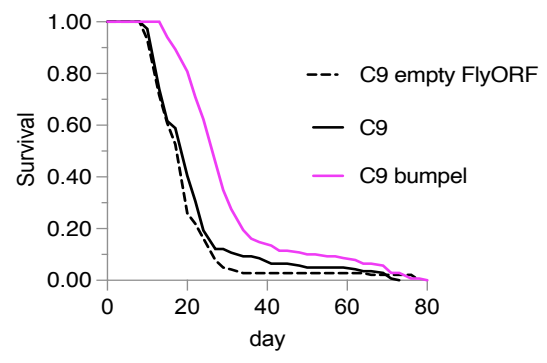

Supplement: pgen.1010893.s001.pdf [file pgen.1010893.s001.pdf]
