# Supplementary material for: A monocarboxylate transporter rescues frontotemporal dementia and Alzheimer’s disease models
Source: PubMed Central journal article supplement (PMC10513295; doi:10.1371/journal.pgen.1010893), 2023-09-21

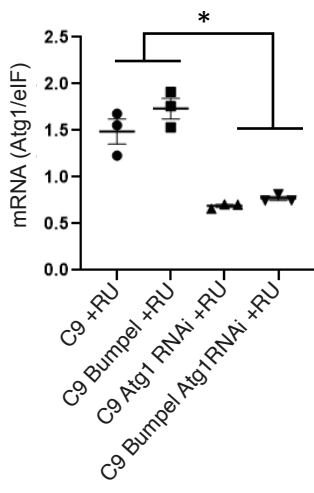

Supplement: pgen.1010893.s006.pdf [file pgen.1010893.s006.pdf]
